# Supplementary material for: Cryoablation using liquid nitrogen for metastatic lung cancers
Source: Research Square preprint supplement (doi:10.21203/rs.3.rs-926836/v2), 2022-06-08
Supplement: Supplementary file 1 [file d3db63d3a1e81e07a4d77f84.docx]

Table S1 Histological type of tumors

Histological type Number of patients (%)

Carcinoma (n=53)

Colon/rectal cancer 18 (26.9)

Lung cancer 13 (19.4)

Renal cell cancer 4 (6.0)

Breast cancer 3 (4.5)

Hypopharyngeal cancer 2 (3.0)

Stomach cancer 2 (3.0)

Ovarian cancer 2 (3.0)

Urachal cancer 2 (3.0)

Others 6 (9.0)

Sarcoma (n=15)

Leiomyosarcoma 12 (17.6)

Osteosarcoma 2 (3.0)

Synovial sarcoma 1 (1.5)
